# Supplementary material for: Prompt and synergistic antibacterial activity of silver nanoparticle-decorated silica hybrid particles on air filtration
Source: Royal Society of Chemistry journal article supplement (doi:10.1039/c4tb01068j), 2014-01-01
Supplement: c4tb01068j1.pdf [file c4tb01068j1.pdf]

Supporting Information for

## Prompt and Synergistic Antibacterial Activity of Silver Nanoparticle-Decorated Silica Hybrid Particles on Air Filtration

Young-Seon Ko<sup>a</sup>, Yun Haeng Joe<sup>b</sup>, Mihwa Seo<sup>a</sup>, Kipil Lim<sup>a</sup>, Jungho Hwang<sup>b</sup>, and Kyoungja Woo<sup>\*a,c</sup>

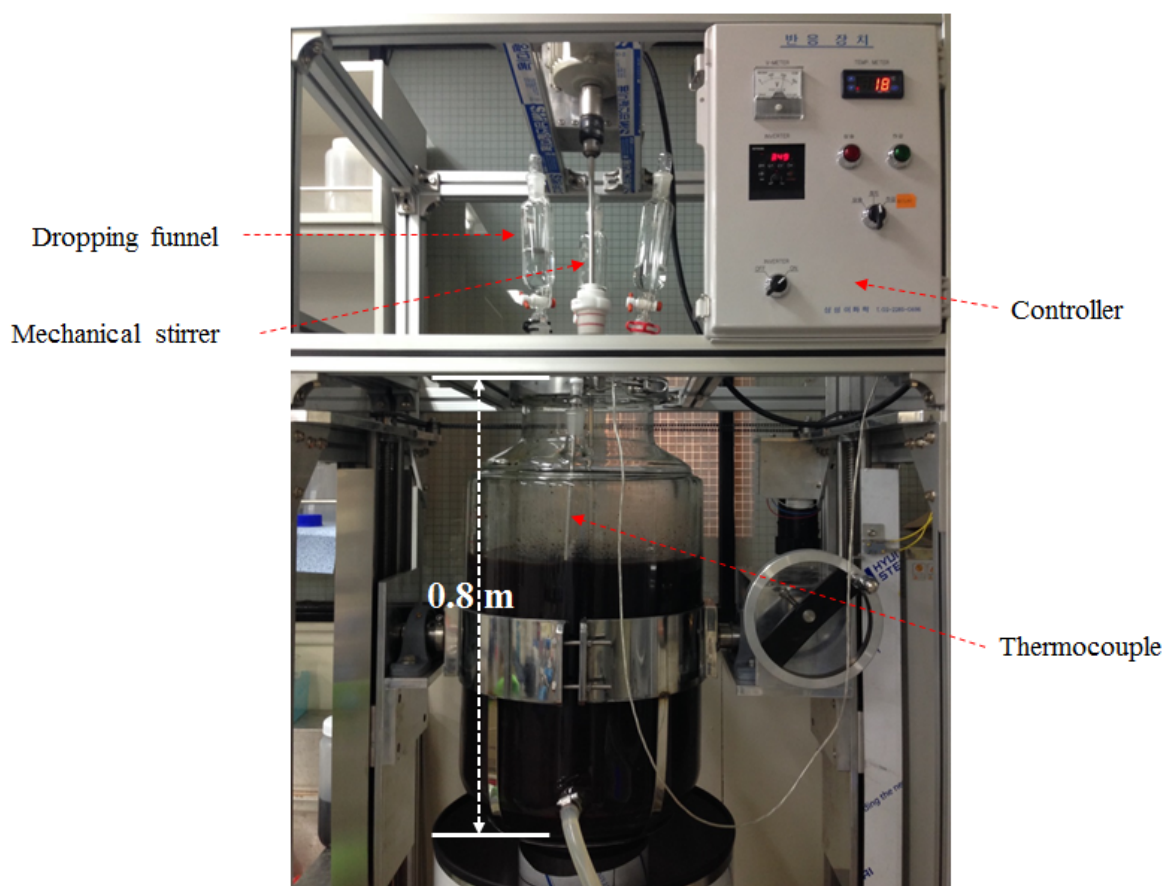

**Fig. S1.** Tailor-made 50 L reactor.

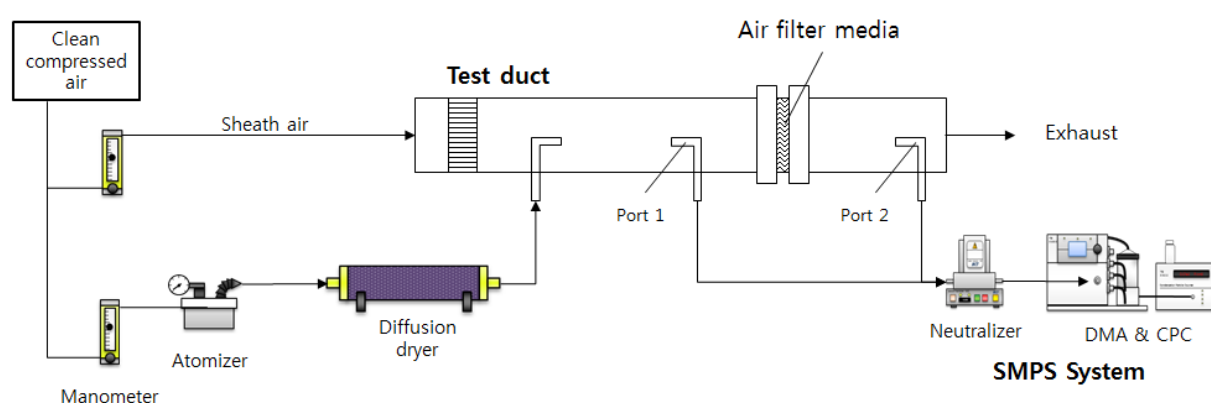

**Fig. S2.** Experimental setup for fabrication of antibacterial air filter.

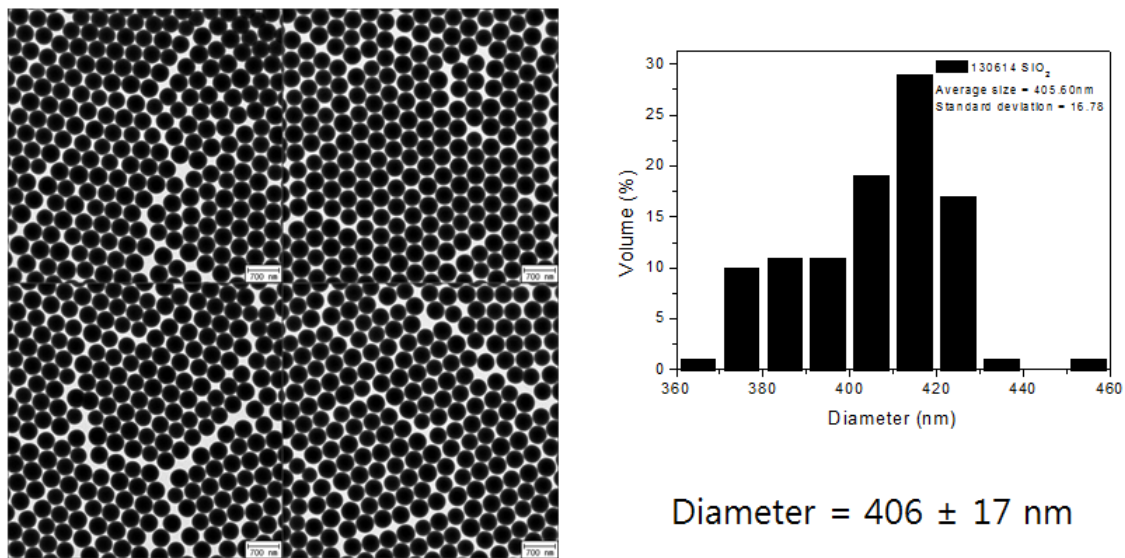

**Fig. S3.** TEM image and size distribution of  $_{AP}SiO_2$  particles.

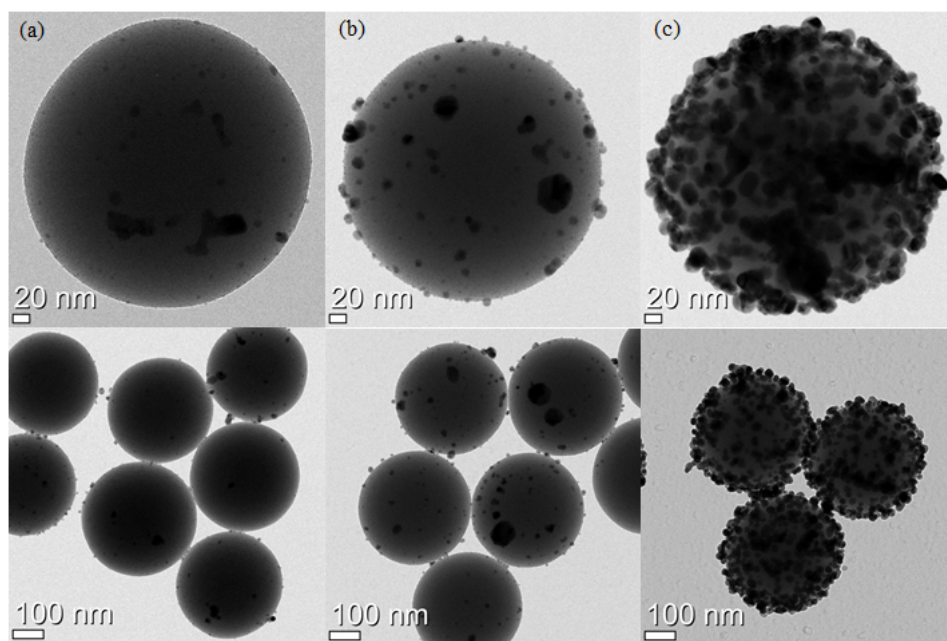

**Fig. S4.** TEM images of hybrid particles through fabrication process of AgNP@SiO<sub>2</sub>: (a) after seeding; (b) after sorting-out; (c) after growing.

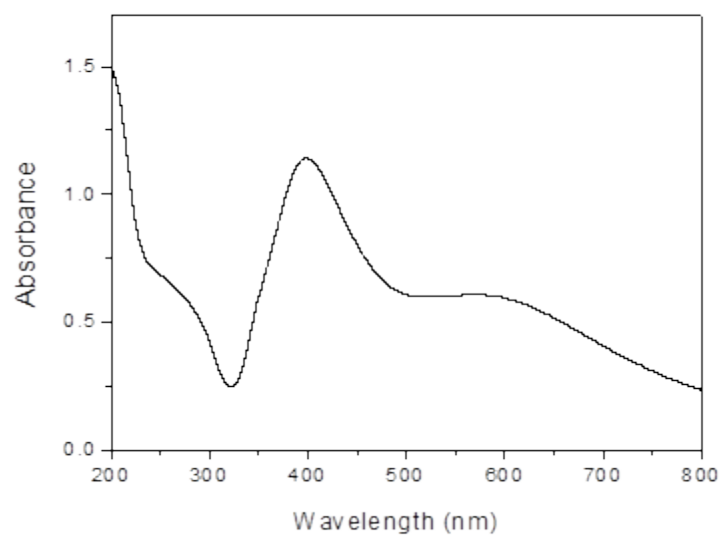

**Fig. S5.** Absorption spectrum of AgNP@SiO<sub>2</sub> colloidal solution.

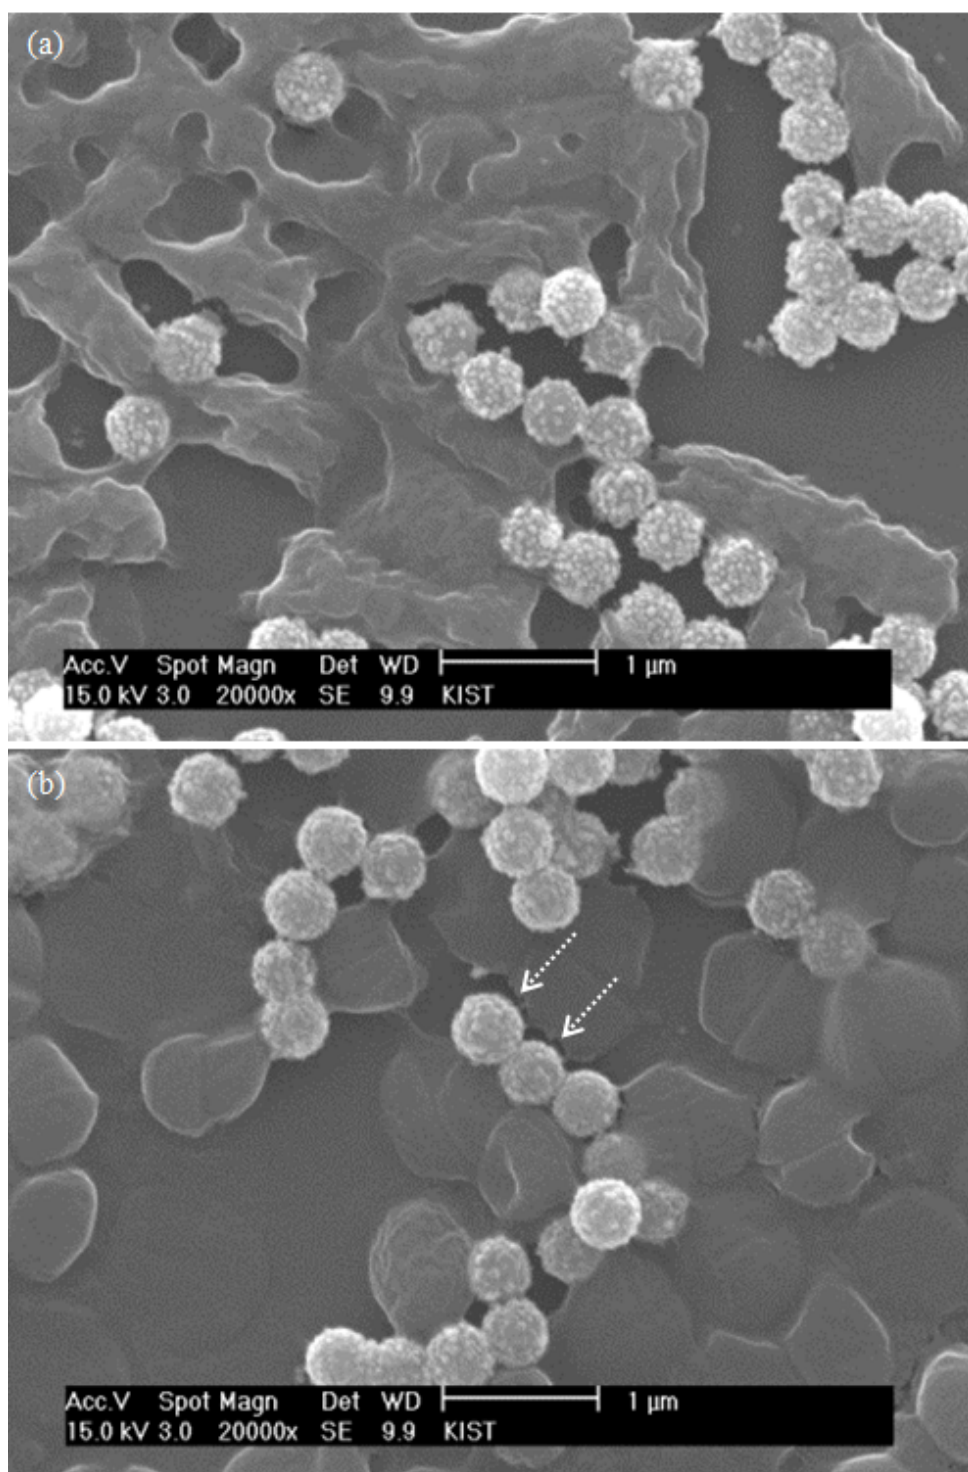

**Fig. S6.** SEM images of (a) *E. coli* and (b) *S. epidermidis* showing interaction with AgNP@SiO<sub>2</sub> hybrid colloids after incubation for 30 min.
